# Supplementary material for: Fluorescent probes for superresolution imaging of lipid domains on the plasma membrane
Source: Royal Society of Chemistry journal article supplement (doi:10.1039/c1sc00169h), 2011-01-01
Supplement: c1sc00169h.pdf [file c1sc00169h.pdf]

### Supplementary Figure 1

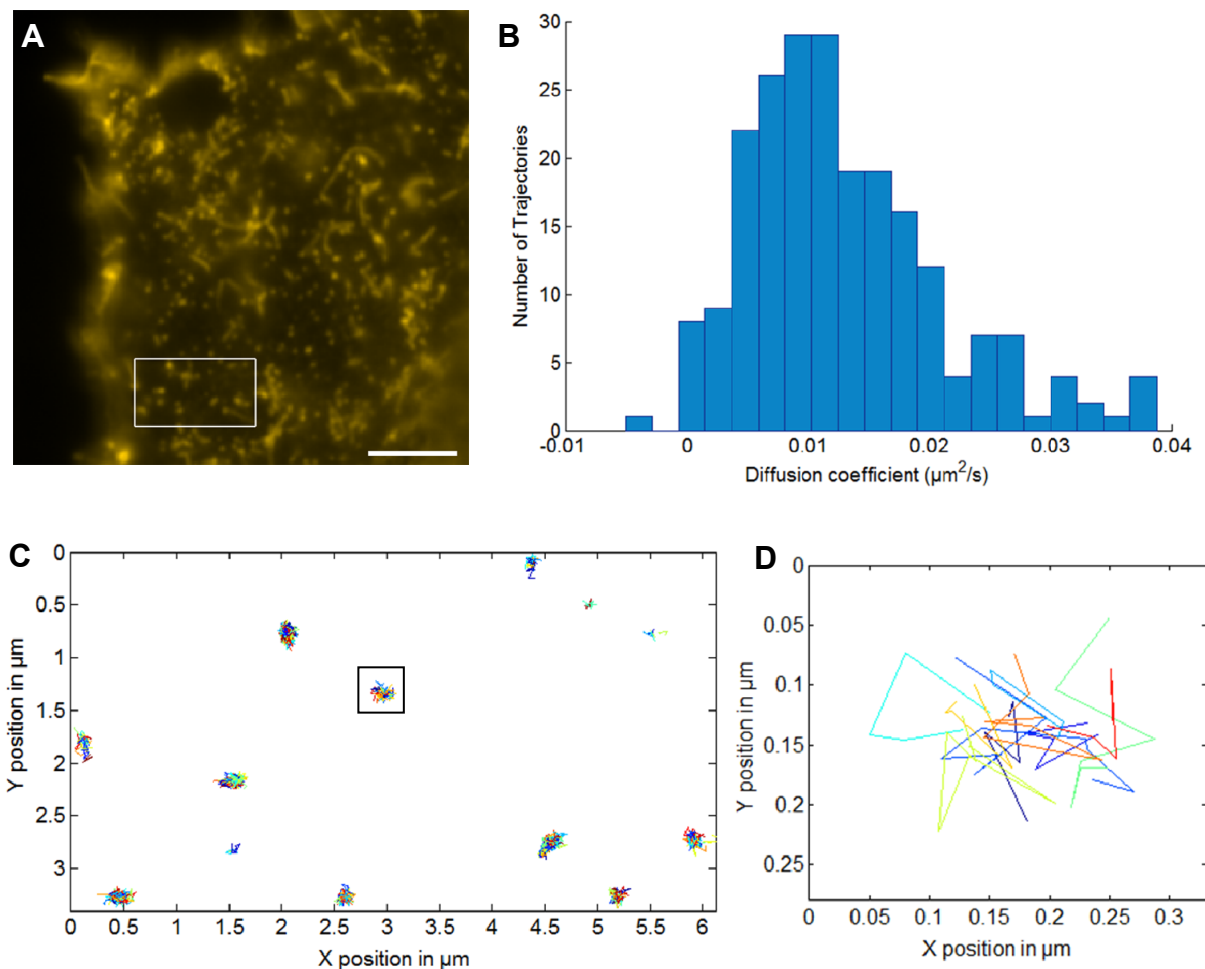

**Supplementary Figure S1.** Mobility of Dronpa- $\theta$ -D4 molecules. **(A)** Diffraction limited image of cholesterol enriched domains integrated over 1000 frames. Scale bar: 5  $\mu\text{m}$ . **(B)** Distribution of the diffusion coefficients of trajectories described by Dronpa- $\theta$ -D4 molecules that remain fluorescent for more than 4 consecutive frames (corresponding to 124 ms). The diffusion coefficient is calculated using the first 3 points of the MSD for each individual trajectory (for a total of 220 trajectories). The mean value of the diffusion coefficient (0.013  $\mu\text{m}^2/\text{s}$ ) corresponds to a mean displacement of 46 nm between consecutive frames. **(C)** Trajectories described by Dronpa- $\theta$ -4 molecules in the area indicated in (A). Each color indicates a different track. Although mobile, the molecules are confined within the cholesterol enriched domains. **(D)** Ten randomly chosen trajectories present in the domain indicated by the black square in (C). Each Dronpa- $\theta$ -4 molecule covers an area smaller than the total area of the domain.
